# Supplementary material for: Impact of microstructure on the electron–hole interaction in lead halide perovskites
Source: Royal Society of Chemistry journal article supplement (doi:10.1039/c7ee00685c), 2017-01-01
Supplement: c7ee00685c1.pdf [file c7ee00685c1.pdf]

## Electronic Supplementary Information

### Impact of Microstructure on the Electron-hole Interaction in Metal Halide Perovskites

Arman Mahboubi Soufiani<sup>1†</sup>, Zhuo Yang<sup>2†</sup>, Trevor Young<sup>1</sup>, Atsuhiko Miyata<sup>2</sup>, Alessandro Surrente<sup>2</sup>,  
Alexander Pascoe<sup>3</sup>, Krzysztof Galkowski<sup>2,4</sup>, Mojtaba Abdi-Jalebi<sup>5</sup>, Roberto Brenes<sup>6</sup>, Joanna Urban<sup>2</sup>,  
Nan Zhang<sup>2</sup>, Vladimir Bulović<sup>5</sup>, Oliver Portugall<sup>2</sup>, Yi-Bing Cheng<sup>3</sup>, Robin J. Nicholas<sup>7</sup>,  
Anita Ho-Baillie<sup>1\*</sup>, Martin A. Green<sup>1</sup>, Paulina Plochocka<sup>2\*</sup>, Samuel D. Stranks<sup>5,6\*</sup>

<sup>1</sup>Australian Centre for Advanced Photovoltaics,  
School of Photovoltaic and Renewable Energy Engineering,  
University of New South Wales, Sydney, NSW 2052, Australia

<sup>2</sup>Laboratoire National des Champs Magnétiques Intenses, CNRS-UGA-UPS-INSA, 143  
Avenue de Rangueil, 31400 Toulouse, France

<sup>3</sup>Department of Materials Science and Engineering, Monash University, Clayton, Vic 3800, Australia

<sup>4</sup>Institute of Experimental Physics, University of Warsaw - Pasteura 5, 02-093 Warsaw, Poland

<sup>5</sup>Cavendish Laboratory, University of Cambridge, J. J. Thomson Avenue, Cambridge CB3 0HE,  
United Kingdom

<sup>6</sup>Research Laboratory of Electronics, Massachusetts Institute of Technology, Cambridge, MA 02139,  
United States

<sup>7</sup>Clarendon Laboratory, University of Oxford, Parks Road, Oxford OX1 3PU, United Kingdom

<sup>†</sup> These authors contributed equally to this work.

\* e-mail:

[sds65@cam.ac.uk](mailto:sds65@cam.ac.uk)

[paulina.plochocka@lncmi.cnrs.fr](mailto:paulina.plochocka@lncmi.cnrs.fr)

[a.ho-baillie@unsw.edu.au](mailto:a.ho-baillie@unsw.edu.au)

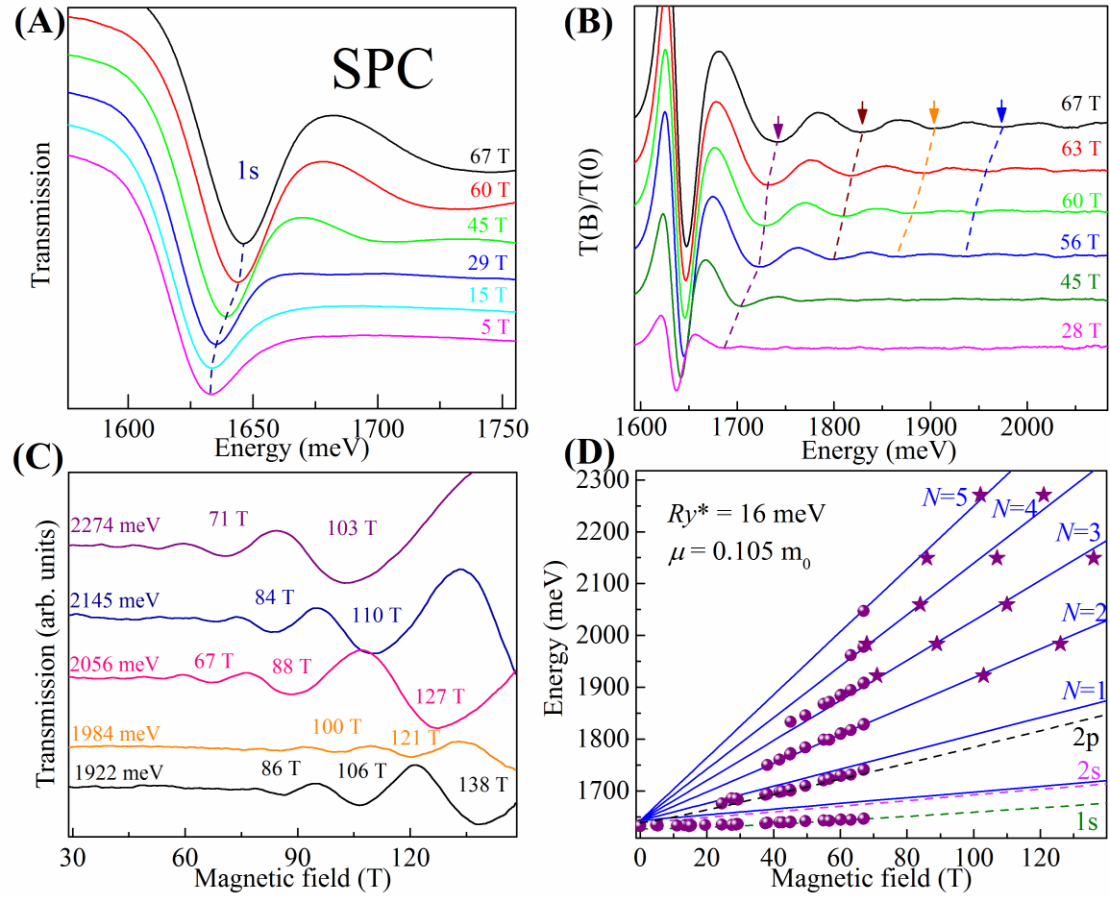

**Figure S1 Magneto-optical transmission spectrum and fan chart measured at 2 K.** **A)** Sequence of typical optical transmission spectra of the **SPC** sample measured at the indicated magnetic fields which show the 1s excitonic transition with increased transmission. **B)** Sequences of the ratios of the transmission spectra in magnetic field  $T(B)$  to that measured at zero field  $T(0)$ . The resonant absorption features of the free carrier Landau levels correspond to minima. **C)** Typical results of the low temperature monochromatic transmission as a function of magnetic field obtained by the short pulse technique. **D)** Fan chart of MAPbI<sub>3</sub> for the small grain polycrystalline sample. The circular data points are from long pulse field measurements and star symbol points are collected by short pulse mega-gauss measurements. The solid lines and the dashed lines are the fits to the set of Landau levels and the excitonic transitions, respectively.

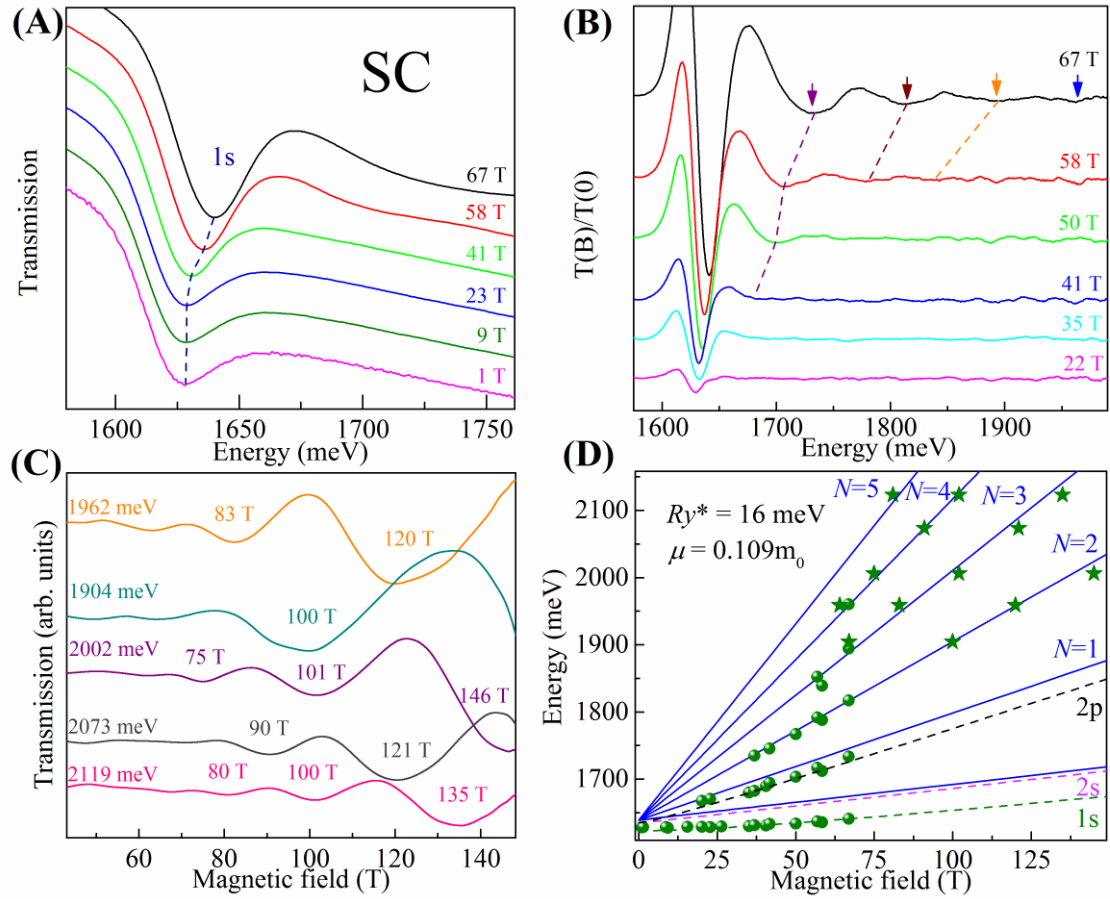

**Figure S2 Magneto-optical transmission spectrum and fan chart measured at 2 K.** **A)** Sequence of typical optical transmission spectra of the **SC** sample measured at the indicated magnetic fields which show the 1s excitonic transition with increased transmission. **B)** Sequences of the ratios of the transmission spectra in magnetic field  $T(B)$  to that measured at zero field  $T(0)$ . The resonant absorption features of the free carrier Landau levels correspond to minima. **C)** Typical results of the low temperature monochromatic transmission as a function of magnetic field obtained by the short pulse technique. **D)** Fan chart of MAPbI<sub>3</sub> for the small grain (SC) sample. The circular data points are from long pulse field measurements and star symbol points are collected by short pulse mega-gauss measurements. The solid lines and the dashed lines are the fits to the set of Landau levels and the excitonic transitions, respectively.

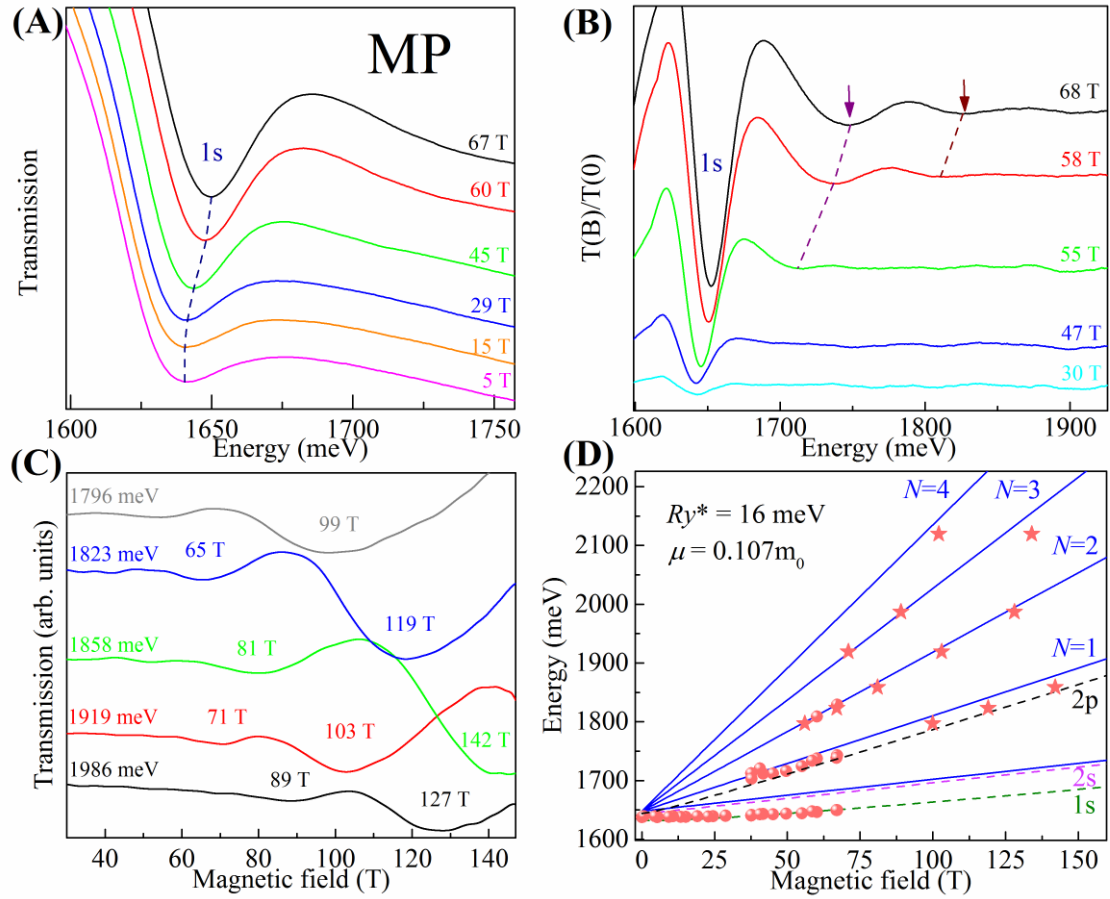

**Figure S3 Magneto-optical transmission spectrum and fan chart measured at 2 K.** **A)** Sequence of typical optical transmission spectra of the **MP** sample measured at the indicated magnetic fields which show the 1s excitonic transition with increased transmission. **B)** Sequences of the ratios of the transmission spectra in magnetic field  $T(B)$  to that measured at zero field  $T(0)$ . The resonant absorption features of the free carrier Landau levels correspond to minima. **C)** Typical results of the low temperature monochromatic transmission as a function of magnetic field obtained by the short pulse technique. **D)** Fan chart of MAPbI<sub>3</sub> for the mesoporous small grain (MP) sample. The circular data points are from long pulse field measurements and star symbol points are collected by short pulse mega-gauss measurements. The solid lines and the dashed lines are the fits to the set of Landau levels and the excitonic transitions, respectively.

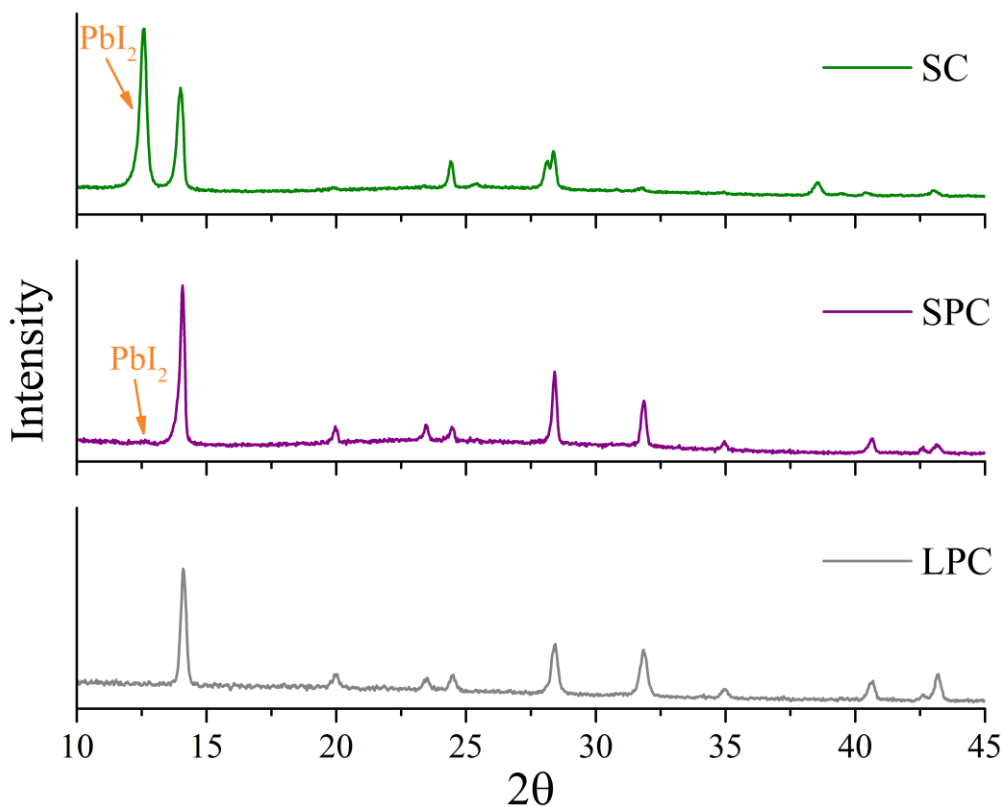

**Figure S4 X-Ray Diffraction (XRD) patterns of different MAPbI<sub>3</sub> microstructures.**

The XRD patterns show that the LPC, SPC and SC MAPbI<sub>3</sub> thin films exhibit the tetragonal perovskite structure. There exists small amount of crystalline PbI<sub>2</sub> impurities in the SPC and SC samples (see the features at an angle of 12.5°), indicating that the presence of small amounts of PbI<sub>2</sub> seemingly does not affect the excitonic properties of perovskites.

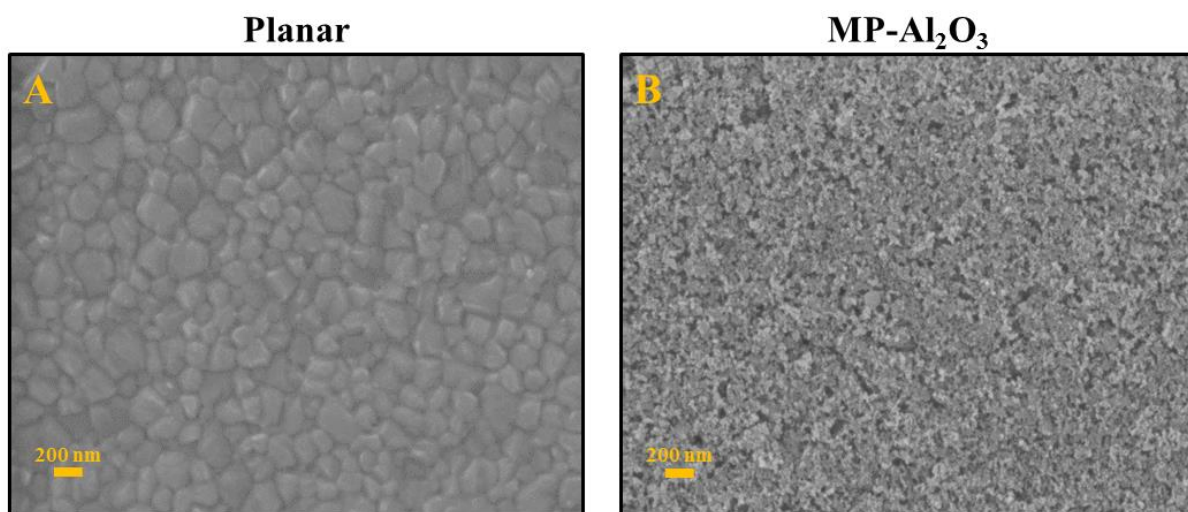

**Figure S5 Morphology of  $\text{Cs}_{0.05}(\text{MA}_{0.17}\text{FA}_{0.83})_{0.95}\text{Pb}(\text{I}_{0.83}\text{Br}_{0.17})_3$  samples.** Top-view SEM images of the triple-cation lead mixed-halide layer with two different morphologies fabricated on glass substrates. **A)** Polycrystalline planar thin film. **B)**  $\text{Cs}_{0.05}(\text{MA}_{0.17}\text{FA}_{0.83})_{0.95}\text{Pb}(\text{I}_{0.83}\text{Br}_{0.17})_3$  infiltrated into a thick mesoporous- $\text{Al}_2\text{O}_3$  (MP- $\text{Al}_2\text{O}_3$ ) scaffold. Scale bars are 200 nm.

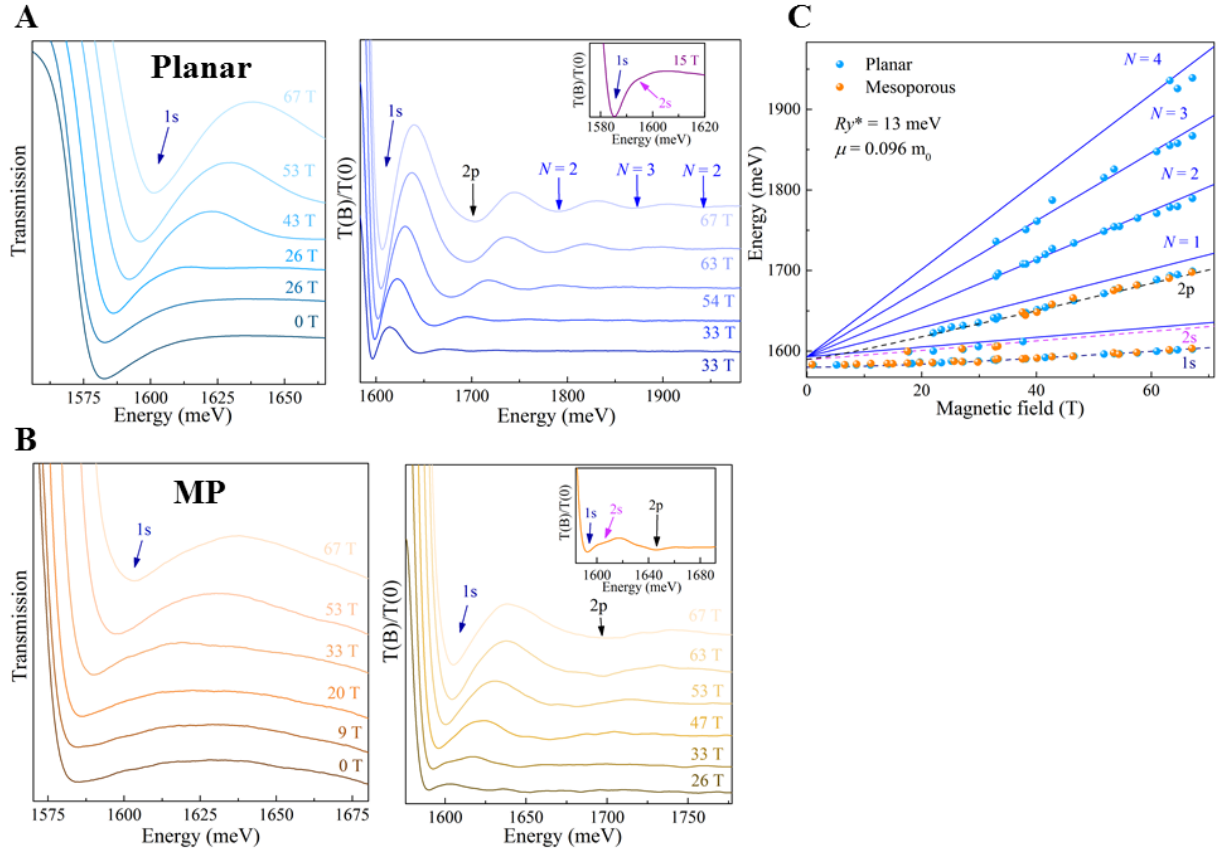

**Figure S6 Magneto-optical transmission spectra and fan chart of  $\text{Cs}_{0.05}(\text{MA}_{0.17}\text{FA}_{0.83})_{0.95}\text{Pb}(\text{I}_{0.83}\text{Br}_{0.17})_3$  measured at 2 K. A and B)** Left panels: sequence of typical optical transmission spectra of the planar polycrystalline (A) and perovskite-infiltrated mesoporous- $\text{Al}_2\text{O}_3$  (B) samples measured at the indicated magnetic fields which show the 1s excitonic transitions with increased transmission. **A and B)** Right panels: sequences of the ratios of the transmission spectra in magnetic field  $T(B)$  to that measured at zero field  $T(0)$  for both triple-cation lead mixed-halide samples. **C)** Overlaid fan chart of the Planar and MP samples. The solid lines and the dashed lines are the fits to the set of Landau levels and the excitonic transitions, respectively.

**Table S1** Summary of the parameters of the fits to the fan chart for the two different morphologies of  $\text{Cs}_{0.05}(\text{MA}_{0.17}\text{FA}_{0.83})_{0.95}\text{Pb}(\text{I}_{0.83}\text{Br}_{0.17})_3$  in the low temperature (2 K), orthorhombic phases. The figures in the brackets are the error estimates of the parameters.

|                   | $E_g$ (meV) | $\mu$ ( $m_0$ ) | $Ry^*$ (meV) |
|-------------------|-------------|-----------------|--------------|
| <b>Planar</b>     | 1593(2)     | 0.096(0.002)    | 13(2)        |
| <b>Mesoporous</b> | 1594(2)     | 0.096(0.008)    | 13(2)        |



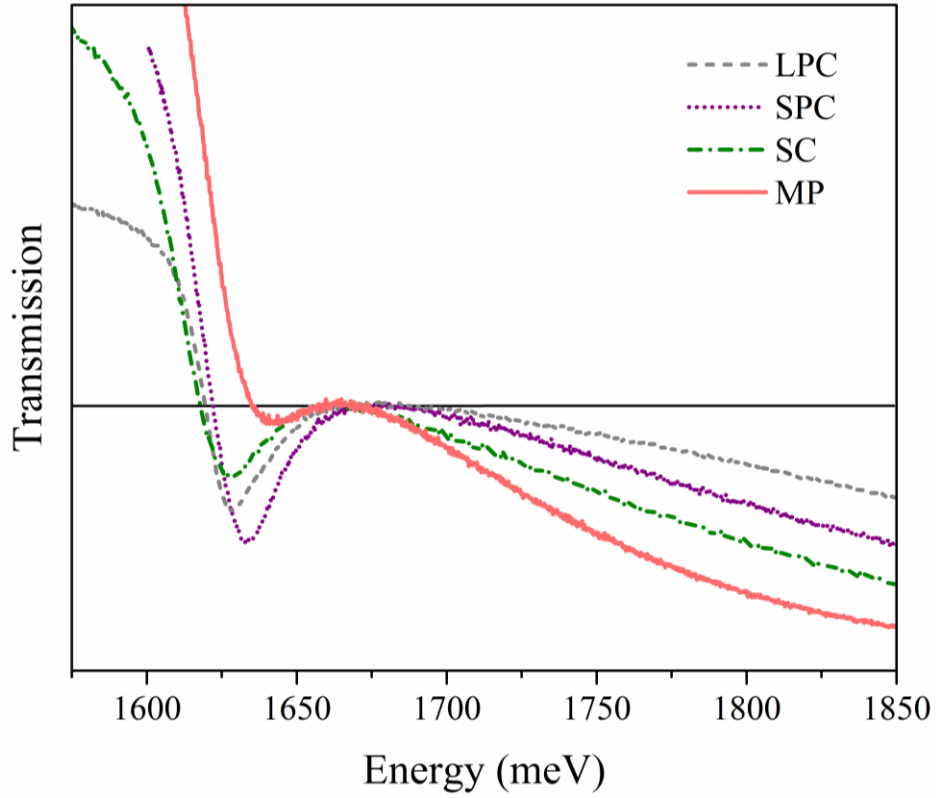

**Figure S7 Transmission spectra of four different MAPbI<sub>3</sub> morphologies.** The transmission spectra of **MP** (solid line), **SC** (dash-dotted line), **SPC** (dotted line) and **LPC** (dashed line) samples are normalized to a point on the plateau at the higher energy end of their spectrum.

These transmission results show different excitonic transition strength (corresponding to a dip in transmission spectra) at the absorption edge while the excitonic binding energy and effective mass remained relatively unchanged in these various microstructures (see panel C of Figure 3 and Table 1 in the main text).
